# Supplementary material for: Cuprous iodide coordination polymers (CuI)x(L)y·z(solvent) built on linear thioether linkers
Source: Royal Society of Chemistry journal article supplement (doi:10.1039/c0ce00685h), 2011-01-01
Supplement: c0ce00685h.pdf [file c0ce00685h.pdf]

# Cuprous iodide coordination polymers (CuI)<sub>x</sub>(L)<sub>x</sub>·y(solvent) built on linear thioether linkers

*Jun Zhang, Yun-Shan Xue, Yi-Zhi Li, Hong-Bin Du\* and Xiao-Zeng You*

State Key Laboratory of Coordination Chemistry, School of Chemistry and Chemical Engineering, Nanjing University, Nanjing, 210093, China. E-mail: hbdu@nju.edu.cn

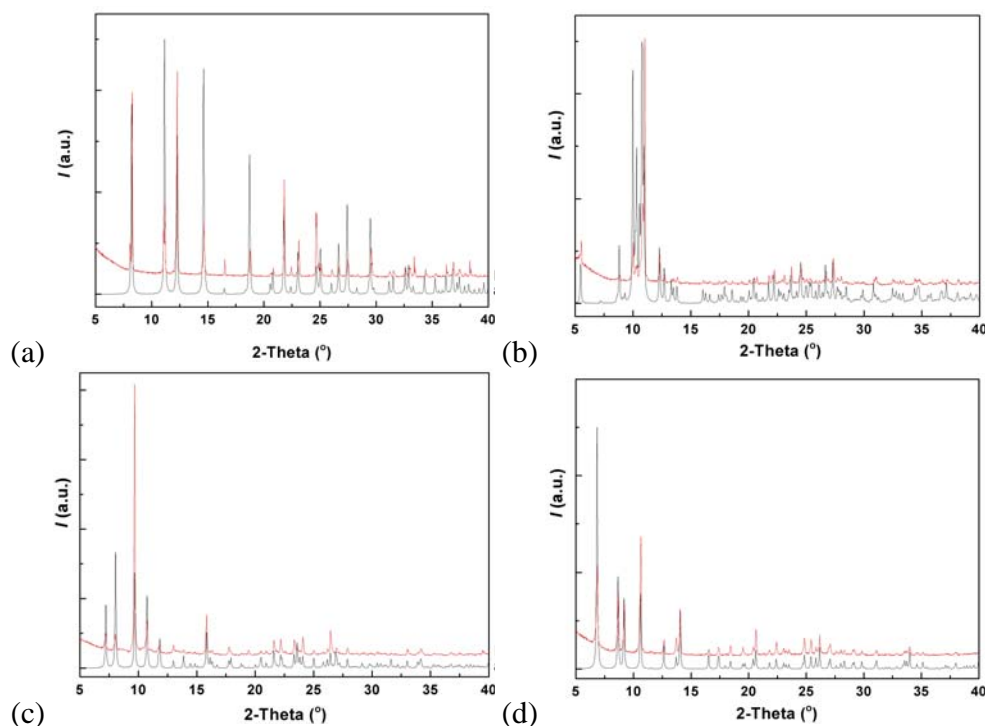

**Fig. S1.** Calculated (black) and experimental (red) PXRD patterns of MSF-6 (a), -7 (b), -8 (c) and -9 (d).

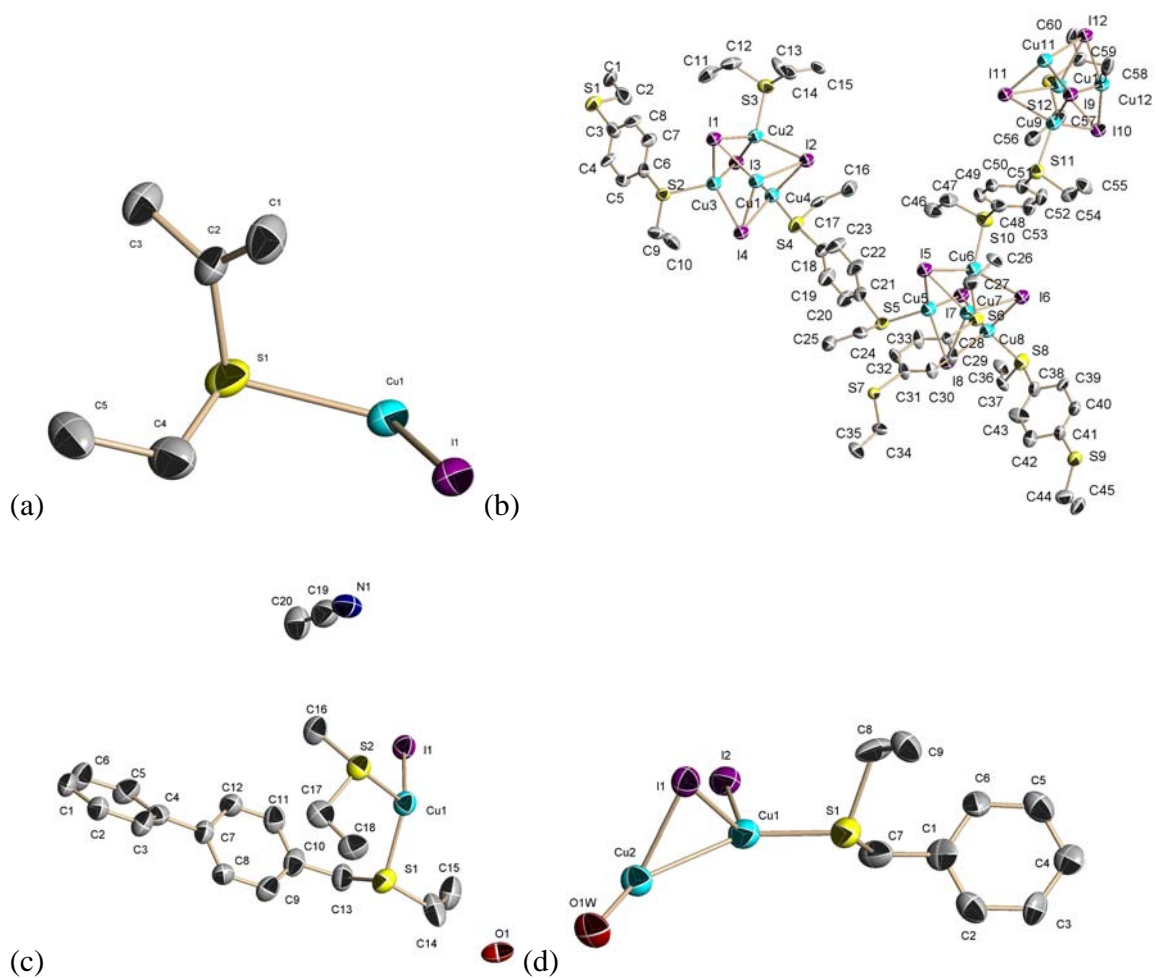

**Fig. S2.** ORTEP drawings of the asymmetric unit of (a) MSF-6, (b) MSF-7, (c) MSF-8 and (d) MSF-9, respectively, at the 50% probability. The H atoms are omitted for clarity.

**Table S1.** Some relevant interatomic lengths (Å) and angles (deg) for MSF-7

| MSF-7                     |            |            |            |              |            |                            |            |
|---------------------------|------------|------------|------------|--------------|------------|----------------------------|------------|
| Cu5—S5                    | 2.317(3)   | Cu6—I5     | 2.7420(14) | Cu9—S11      | 2.342(3)   | Cu10—Cu11                  | 2.7592(16) |
| Cu5—I5                    | 2.6293(13) | Cu6—Cu8    | 2.8684(17) | Cu9—I11      | 2.6713(13) | Cu10—Cu12                  | 2.8802(17) |
| Cu5—I7                    | 2.6437(13) | Cu7—S6     | 2.328(3)   | Cu9—I10      | 2.6779(14) | Cu11—S1 <sup>i</sup>       | 2.308(3)   |
| Cu5—Cu6                   | 2.6891(17) | Cu7—I8     | 2.6717(13) | Cu9—I9       | 2.6965(13) | Cu11—I11                   | 2.6422(13) |
| Cu5—I8                    | 2.7542(13) | Cu7—I6     | 2.6910(14) | Cu9—Cu10     | 2.7277(16) | Cu11—I12                   | 2.6452(14) |
| Cu5—Cu8                   | 2.8074(17) | Cu7—I5     | 2.7170(13) | Cu9—Cu12     | 2.7775(17) | Cu11—I9                    | 2.7363(13) |
| Cu5—Cu7                   | 2.8140(16) | Cu7—Cu8    | 2.7795(17) | Cu9—Cu11     | 2.8583(17) | Cu11—Cu12                  | 2.7697(17) |
| Cu6—S10                   | 2.317(3)   | Cu8—S8     | 2.342(3)   | Cu10—S12     | 2.318(3)   | Cu12—S9 <sup>iv</sup>      | 2.318(3)   |
| Cu6—I6                    | 2.6473(13) | Cu8—I6     | 2.6552(14) | Cu10—I10     | 2.6727(13) | Cu12—I12                   | 2.6638(13) |
| Cu6—I7                    | 2.7274(13) | Cu8—I8     | 2.6625(14) | Cu10—I12     | 2.6991(13) | Cu12—I9                    | 2.6703(13) |
| Cu6—Cu7                   | 2.7360(16) | Cu8—I7     | 2.6890(13) | Cu10—I11     | 2.7093(14) | Cu12—I10                   | 2.7189(13) |
| S7 <sup>iii</sup> —Cu1—I4 | 109.50(7)  | I3—Cu3—I4  | 114.89(5)  | I5—Cu5—Cu6   | 62.06(4)   | I10—Cu10—I11               | 114.10(5)  |
| S7 <sup>iii</sup> —Cu1—I1 | 107.91(7)  | S2—Cu3—I1  | 99.72(7)   | I7—Cu5—Cu6   | 61.51(4)   | I12—Cu10—I11               | 111.31(4)  |
| I4—Cu1—I1                 | 114.71(5)  | I3—Cu3—I1  | 109.44(4)  | S5—Cu5—I8    | 99.28(7)   | S1 <sup>i</sup> —Cu11—I11  | 113.31(8)  |
| S7 <sup>iii</sup> —Cu1—I2 | 107.95(7)  | I4—Cu3—I1  | 110.84(4)  | I8—Cu8—I7    | 111.96(5)  | S1 <sup>i</sup> —Cu11—I12  | 105.70(9)  |
| I4—Cu1—I2                 | 108.45(4)  | S4—Cu4—I2  | 116.69(8)  | S11—Cu9—I11  | 104.93(7)  | I11—Cu11—I12               | 115.25(5)  |
| I1—Cu1—I2                 | 108.14(4)  | S4—Cu4—I4  | 106.29(9)  | S11—Cu9—I10  | 103.84(7)  | S1 <sup>i</sup> —Cu11—I9   | 103.00(8)  |
| S3—Cu2—I2                 | 106.23(8)  | I2—Cu4—I4  | 110.01(4)  | I11—Cu9—I10  | 115.20(5)  | I11—Cu11—I9                | 106.62(4)  |
| S3—Cu2—I1                 | 108.65(8)  | S4—Cu4—I3  | 100.13(8)  | S11—Cu9—I9   | 112.90(7)  | I12—Cu11—I9                | 112.39(5)  |
| I2—Cu2—I1                 | 110.93(4)  | I2—Cu4—I3  | 110.41(4)  | I11—Cu9—I9   | 106.94(4)  | S9 <sup>iv</sup> —Cu12—I12 | 104.24(8)  |
| S3—Cu2—I3                 | 108.92(8)  | I4—Cu4—I3  | 113.05(5)  | I10—Cu9—I9   | 112.89(5)  | S9 <sup>iv</sup> —Cu12—I9  | 118.85(8)  |
| I2—Cu2—I3                 | 110.51(4)  | S5—Cu5—I5  | 112.46(7)  | S12—Cu10—I10 | 109.15(7)  | I12—Cu12—I9                | 113.94(5)  |
| I1—Cu2—I3                 | 111.43(5)  | S5—Cu5—I7  | 106.24(8)  | S12—Cu10—I12 | 108.06(8)  | S9 <sup>iv</sup> —Cu12—I10 | 98.79(8)   |
| S2—Cu3—I3                 | 115.56(7)  | I5—Cu5—I7  | 118.39(5)  | I10—Cu10—I12 | 107.31(5)  | I12—Cu12—I10               | 106.99(4)  |
| S2—Cu3—I4                 | 105.33(7)  | S5—Cu5—Cu6 | 152.69(8)  | S12—Cu10—I11 | 106.76(8)  | I9—Cu12—I10                | 112.41(5)  |

Symmetry transformations: (i) -x, -y, 1-z; (ii) -x, 1-y, 2-z; (iii) 2-x, -y, 1-z; (iv) 2-x, 1-y, 2-z.
